# Supplementary material for: Perceptual learning and neural correlates of virtual navigation in subjective cognitive decline: A pilot study
Source: PubMed Central journal article supplement (PMC11634985; doi:10.1016/j.isci.2024.111411), 2024-11-17
Supplement: mmc1.pdf [file mmc1.pdf]

**iScience, Volume 27**

**Supplemental information**

**Perceptual learning and neural correlates  
of virtual navigation in subjective  
cognitive decline: A pilot study**

**Amir Amedi, Shahar Shelly, Nira Saporta, and Merav Catalogna**

# Perceptual learning and neural correlates of virtual navigation in subjective cognitive decline: A pilot study

Amir Amedi<sup>1,5\*</sup>, Shahar Shelly<sup>2,3</sup>, Nira Saporta<sup>4</sup>, Merav Catalogna<sup>1\*</sup>

<sup>1</sup>The Baruch Ivcher Institute for Brain, Cognition, and Technology, Baruch Ivcher School of Psychology, Reichman University, Herzliya, Israel, <sup>2</sup>Department of Neurology, Rambam Medical Center, Haifa, Israel, <sup>3</sup>Rappaport Faculty of Medicine, Technion-Israel Institute of Technology, Haifa, Israel, <sup>4</sup>Remepy Health Ltd, Ramat Gan, Israel, <sup>5</sup>Lead contact

\*Correspondence: amir.amedia@runi.ac.il (A.A.), [merav@catalogna.co](mailto:merav@catalogna.co) (M.C.)

## Supplemental information

### Table of contents

|          |                                                                                                    |          |
|----------|----------------------------------------------------------------------------------------------------|----------|
| <b>1</b> | <b>Supplemental Tables</b> .....                                                                   | <b>2</b> |
|          | Table S1: Baseline characteristics .....                                                           | 2        |
|          | Table S2: Spatial Memory performance .....                                                         | 2        |
|          | Table S3: Seed-to-voxel based rsFC analysis .....                                                  | 3        |
|          | Table S4: ROI-ROI analysis nodes .....                                                             | 3        |
| <b>2</b> | <b>Supplemental Figures</b> .....                                                                  | <b>5</b> |
|          | Fig S1. Maze setup and error calculation example. ....                                             | 5        |
|          | Fig S2. Maze training daily protocol scheme. ....                                                  | 5        |
|          | Fig S3. Seed-to-voxel R hippocampus connectivity maps of longitudinal differences .....            | 6        |
|          | Fig S4. Seed-to-voxel L hippocampus connectivity maps of longitudinal differences.....             | 6        |
|          | Fig S5. Seed-to-voxel R parahippocampus connectivity maps of longitudinal differences. ....        | 7        |
|          | Fig S6. Seed-to-voxel L parahippocampus connectivity maps of longitudinal differences.....         | 7        |
|          | Fig S7. Seed-to-voxel R parahippocampus connectivity maps of longitudinal differences .....        | 8        |
|          | Fig S8. ROI-to-ROI navigation network analysis of longitudinal post-intervention differences. .... | 8        |
| <b>3</b> | <b>References</b> .....                                                                            | <b>9</b> |

# 1 Supplemental Tables

**Table S1: Baseline characteristics**

|                                      |           |
|--------------------------------------|-----------|
| N                                    | 17        |
| Age                                  | 57.2±1.5  |
| Gender (M)                           | 8 (47.1)  |
| Years of education                   | 16.1±1.7  |
| <b>Marital status</b>                |           |
| Married/Live with a partner          | 13 (76.5) |
| Divorced                             | 4 (23.5)  |
| Number of children                   | 3.1±0.9   |
| PSS-10 (Perceived Stress Scale)      | 15.1±4.5  |
| MoCA (Montreal Cognitive Assessment) | 27.6±1.9  |
| BMI (Kg/m <sup>2</sup> )             | 25.7±2.5  |
| Mean ± SD (%)                        |           |

**Table S2: Spatial Memory performance**

| Cues                  | Time % | DAY1        | DAY14        | p-value | a*    | a[CI]         | b*    | b[CI]           |
|-----------------------|--------|-------------|--------------|---------|-------|---------------|-------|-----------------|
| Auditory - Visual     | 18     | 116.7±9.0   | 143.6±9.6    | < 0.05  | 9.79  | [14.34 15.33] | 111.9 | [101.24 122.49] |
| Auditory - 50% Visual | 19     | 113.1±5.8   | 138.0±10.1   | < 0.05  | 9.79  | [2.88 16.61]  | 107.4 | [94.12 120.7]   |
| Auditory              | 63     | 91.1±8.5    | 113.8±9.4    | < 0.005 | 10.14 | [6.10 14.17]  | 86.16 | [78.35 93.98]   |
| All                   | 100    | 96.4 ± 11.7 | 122.7 ± 13.3 | < 0.005 | 10.94 | [6.58 14.70]  | 91.62 | [83.74 99.49]   |

\* Parameter estimates of fit logarithmic statistics

**Table S3: Seed-to-voxel based rsFC analysis.**

Peak changes in post-treatment functional connectivity

| Seed-HCPex | Seed-HCPex |     |                 |      |       |       |       |         |
|------------|------------|-----|-----------------|------|-------|-------|-------|---------|
| index*     | area*      | R/L | Cluster (x,y,z) | size | p-FWE | p-FDR | p-unc | BA      |
| 80         | HIPP       | L   | -30 -60 -02     | 895  | 0.000 | 0.000 | 0.000 | 19      |
| 80         | HIPP       | L   | -10 -38 +68     | 356  | 0.000 | 0.000 | 0.000 | 5       |
| 80         | HIPP       | L   | -56 -06 +42     | 349  | 0.000 | 0.000 | 0.000 | 4       |
| 80         | HIPP       | R   | +12 -50 +48     | 328  | 0.000 | 0.000 | 0.000 | 31      |
| 80         | HIPP       | L   | -58 -20 +34     | 305  | 0.000 | 0.000 | 0.000 | 40      |
| 80         | HIPP       | L   | -66 -26 +04     | 290  | 0.000 | 0.000 | 0.000 | 22      |
| 80         | HIPP       | L   | -02 -20 +56     | 248  | 0.000 | 0.000 | 0.000 | 6       |
| 80         | HIPP       | R   | +56 +14 -08     | 119  | 0.008 | 0.002 | 0.000 | 38      |
| 80         | HIPP       | R   | +54 +06 +34     | 102  | 0.018 | 0.004 | 0.000 | 6       |
| 80         | HIPP       | L   | -02 -02 +42     | 97   | 0.024 | 0.005 | 0.001 | 24      |
| 80         | HIPP       | R   | +52 -06 +46     | 87   | 0.040 | 0.007 | 0.001 | 6       |
| 80         | HIPP       | L   | -32 -04 +10     | 86   | 0.042 | 0.007 | 0.001 | 13      |
| 80         | HIPP       | L   | -20 -56 +60     | 64   | 0.135 | 0.022 | 0.004 | 7       |
| 80         | HIPP       | R   | +42 -44 -26     | 62   | 0.151 | 0.023 | 0.004 | 37      |
| 260        | HIPP       | R   | +48 -76 -06     | 208  | 0.001 | 0.002 | 0.000 | 19      |
| 260        | HIPP       | L   | -54 -24 +36     | 196  | 0.002 | 0.002 | 0.000 | 40      |
| 260        | HIPP       | R   | +40 +16 +02     | 184  | 0.003 | 0.002 | 0.000 | 13      |
| 260        | HIPP       | L   | -40 -42 -22     | 175  | 0.004 | 0.002 | 0.000 | 7       |
| 260        | HIPP       | L   | -26 -82 -12     | 125  | 0.023 | 0.009 | 0.001 | 18      |
| 260        | HIPP       | R   | +34 +00 -02     | 115  | 0.033 | 0.011 | 0.001 | Putamen |
| 260        | HIPP       | R   | +46 +10 +34     | 108  | 0.044 | 0.012 | 0.001 | 44      |
| 87         | PHA3       | R   | +08 +40 +32     | 176  | 0.033 | 0.027 | 0.001 | 9       |
| 87         | PHA3       | L   | -08 +12 +42     | 140  | 0.089 | 0.050 | 0.002 | 32      |
| 266        | PHA2       | R   | +40 +16 +02     | 195  | 0.019 | 0.023 | 0.000 | 13      |
| 266        | PHA2       | L   | -12 +22 +34     | 163  | 0.046 | 0.028 | 0.001 | 32      |
| 266        | PHA2       | L   | -34 +18 -02     | 135  | 0.099 | 0.042 | 0.002 | 13      |
| 267        | PHA3       | L   | -04 +44 +18     | 158  | 0.006 | 0.005 | 0.000 | 32      |
| 267        | PHA3       | L   | -28 +12 -12     | 123  | 0.021 | 0.009 | 0.001 | Insula  |
| 267        | PHA3       | L   | -54 -24 -14     | 98   | 0.057 | 0.010 | 0.002 | 21      |
| 267        | PHA3       | L   | -16 +52 +24     | 97   | 0.059 | 0.010 | 0.002 | 10      |
| 267        | PHA3       | R   | +34 -22 +16     | 97   | 0.059 | 0.010 | 0.002 | Insula  |
| 132        | RSC        | R   | +50 +06 +48     | 211  | 0.001 | 0.002 | 0.000 | 6       |

|     |     |   |             |     |       |       |       |          |
|-----|-----|---|-------------|-----|-------|-------|-------|----------|
| 132 | RSC | R | +42 +54 +12 | 175 | 0.004 | 0.004 | 0.000 | 10       |
| 132 | RSC | R | +24 +44 -16 | 133 | 0.016 | 0.010 | 0.001 | 47       |
| 132 | RSC | L | -28 -80 -18 | 110 | 0.039 | 0.021 | 0.001 | 34       |
| 132 | RSC | L | -08 +06 +58 | 104 | 0.050 | 0.023 | 0.002 | 6        |
| 8   | V6  | R | +06 -08 +02 | 115 | 0.150 | 0.050 | 0.003 | Thalamus |
| 188 | V6  | R | +04 -18 -03 | 437 | 0.004 | 0.001 | 0.000 | Thalamus |

\* **Glasser** atlas <sup>1</sup>, L, left, R, right, FWE, familywise error, FDR, false discovery rate, X, Y, Z MNI coordinates, BA, Brodmann area

**Table S4: ROI-ROI analysis nodes**

| Brain region                          | HCPex index*               | Cluster (x,y,z) |     |     |
|---------------------------------------|----------------------------|-----------------|-----|-----|
| Visual Area 6                         | HCPex_2mm.8 L V6 8         | -15             | -79 | 31  |
| Visual Area 6A                        | HCPex_2mm.9 L V6A 9        | -21             | -86 | 42  |
| Supplementary and Cingulate Eye Field | HCPex_2mm.40 L SCEF 40     | -5              | 5   | 59  |
| PreMotor Area                         | HCPex_2mm.41 L 55b 41      | -47             | -1  | 50  |
| Hippocampus                           | HCPex_2mm.80 L Hipp 80     | -25             | -24 | -15 |
| ParaHippocampal Area 3                | HCPex_2mm.87 L PHA3 87     | -31             | -37 | -18 |
| PreCuneus Visual Area                 | HCPex_2mm.128 L PCV 128    | -6              | -51 | 48  |
| Posterior Cingulate Cortex            | HCPex_2mm.131 L ProS 131   | -20             | -55 | 4   |
| RetroSplenic Complex                  | HCPex_2mm.132 L RSC 132    | -4              | -34 | 22  |
| Anterior Cingulate Cortex             | HCPex_2mm.142 L a32pr 142  | -7              | 31  | 29  |
| Anterior Cingulate Cortex             | HCPex_2mm.147 L p32pr 147  | -7              | 16  | 39  |
| Dorsolateral Prefrontal Cortex        | HCPex_2mm.176 L a9-46v 176 | -40             | 52  | 11  |
| Visual Area 6                         | HCPex_2mm.188 R V6 188     | 19              | -77 | 31  |
| Visual Area 6A                        | HCPex_2mm.189 R V6A 189    | 22              | -83 | 45  |
| Supplementary and Cingulate Eye Field | HCPex_2mm.220 R SCEF 220   | 7               | 6   | 59  |
| PreMotor Area                         | HCPex_2mm.221 R 55b 221    | 51              | 2   | 48  |
| Hippocampus                           | HCPex_2mm.260 R Hipp 260   | 42              | -1  | -1  |
| ParaHippocampal Area 2                | HCPex_2mm.266 R PHA2 266   | 33              | -34 | -12 |
| ParaHippocampal Area 3                | HCPex_2mm.267 R PHA3 267   | 33              | -37 | -15 |
| PreCuneus Visual Area                 | HCPex_2mm.308 R PCV 308    | 7               | -50 | 49  |
| Anterior Cingulate Cortex             | HCPex_2mm.327 R p32pr 327  | 11              | 15  | 39  |
| Central Medial Thalamus               | HCPex_2mm.362 L CeM 362    | -3              | -9  | 0   |
| Central Medial Thalamus               | HCPex_2mm.395 R CeM 395    | 6               | -8  | 0   |

\* **Glasser** atlas <sup>7</sup>, L, left, R, right, X, Y, Z MNI coordinates

## 2 Supplemental Figures

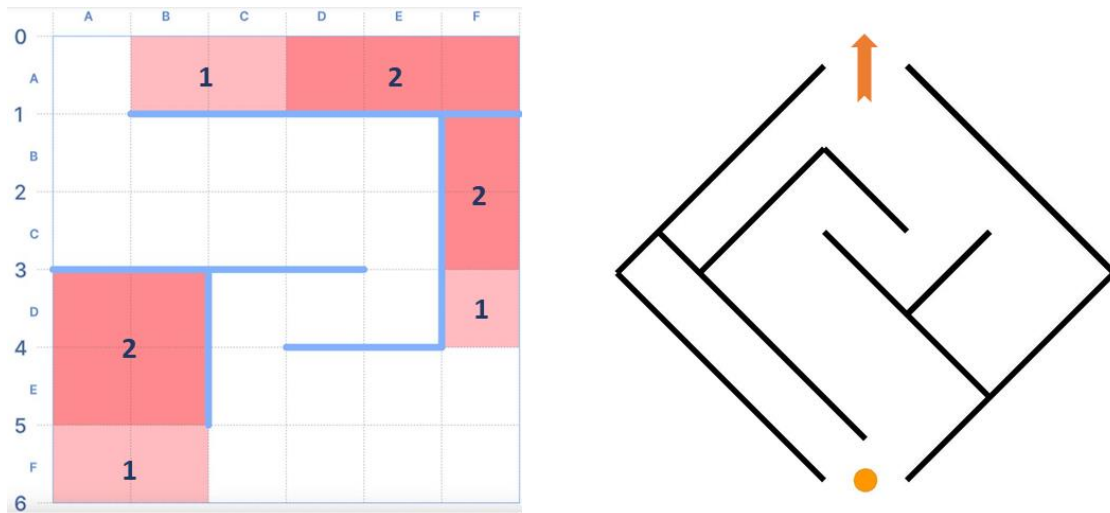

**Figures S1. Maze setup and error calculation example.** The numbers (1 or 2) correspond to errors rate and are based on deviance from the correct path. An error point is added every time a participant enters error zone 1 or turns around towards the entrance instead of walking towards the exit, and 2 points for error zone 2<sup>2</sup>. Time measurement began when participants entered the maze and concluded when they exited. The maze trial score is calculated as  $100 - \text{Time}/5 - \text{Error}$ , where, Time is limited to 3 minutes, and Error is the total error score during the trial. The participant can advance to the next maze only when  $\text{Trial\_Score} \geq 70$ .

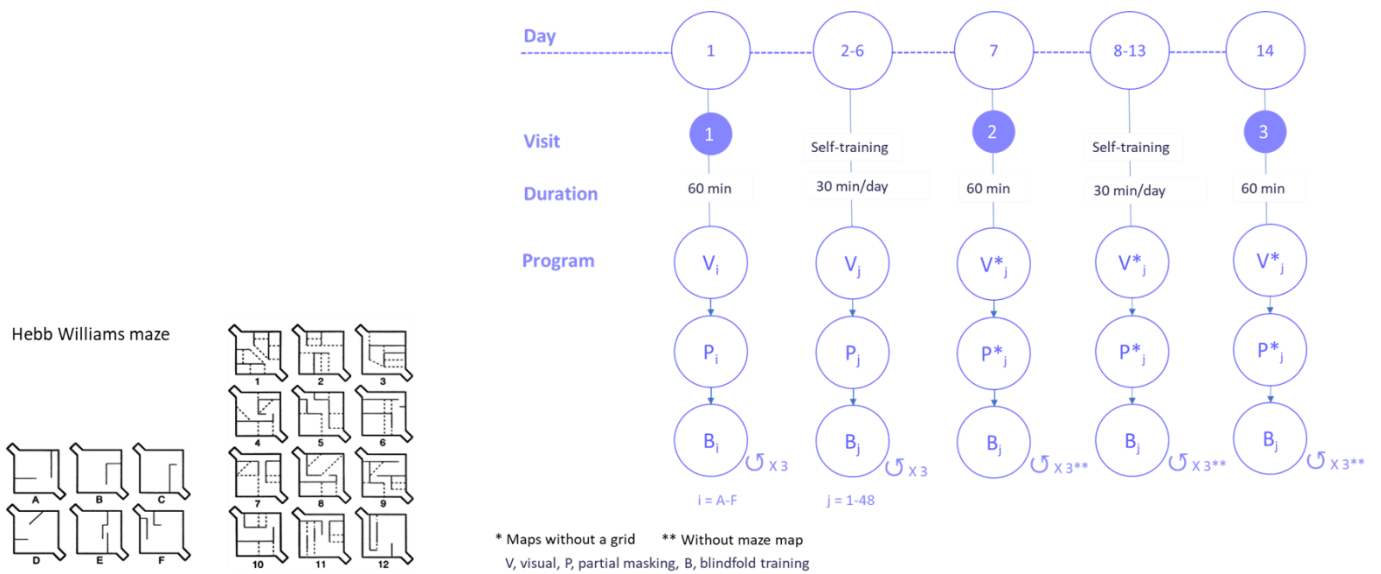

**Figure S2. Maze training daily protocol scheme.**

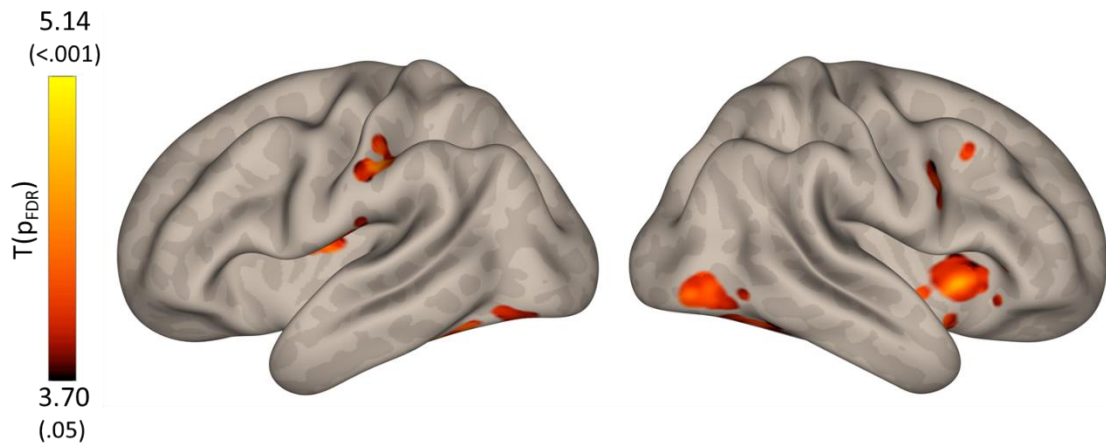

**Fig S3. Seed-to-voxel R hippocampus connectivity maps of longitudinal differences.** Seed: right hippocampus. POST > PRE-intervention of the resting state brain imaging data – group level.  $n = 17$ ,  $p < 0.05$ , FDR corrected, parametric stats, two sided. See also Supplementary Table S2 for details.

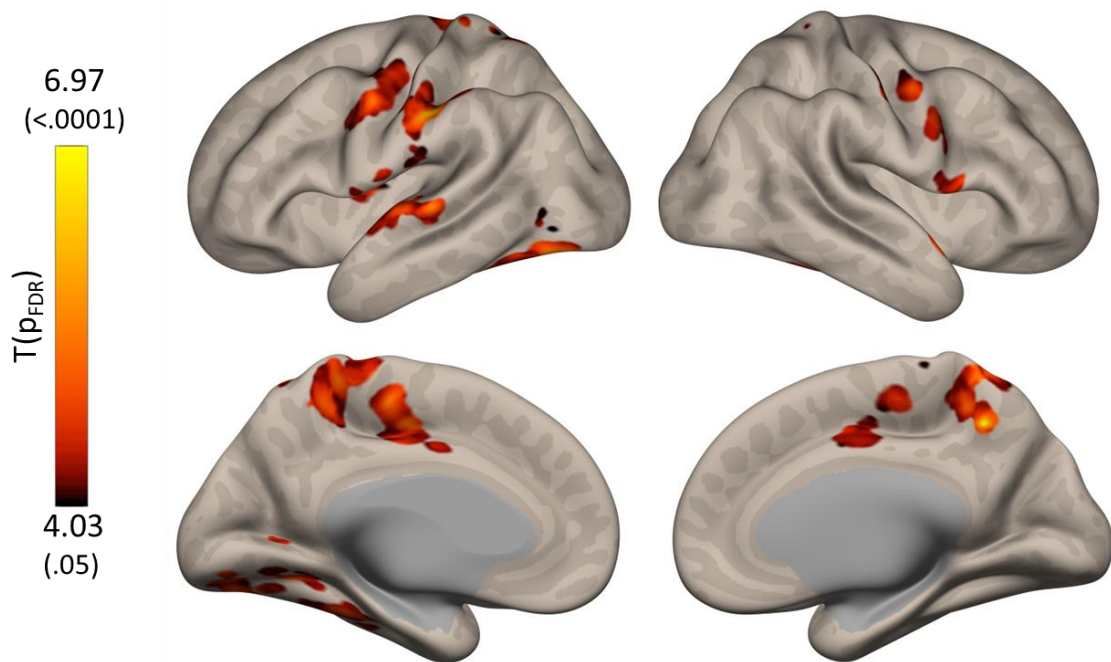

**Fig S4. Seed-to-voxel L hippocampus connectivity maps of longitudinal differences.** Seed: left hippocampus. POST > PRE-intervention of the resting state brain imaging data – group level.  $n = 17$ ,  $p < 0.05$ , FDR corrected, parametric stats, two sided. See also Supplementary Table S2 for details.

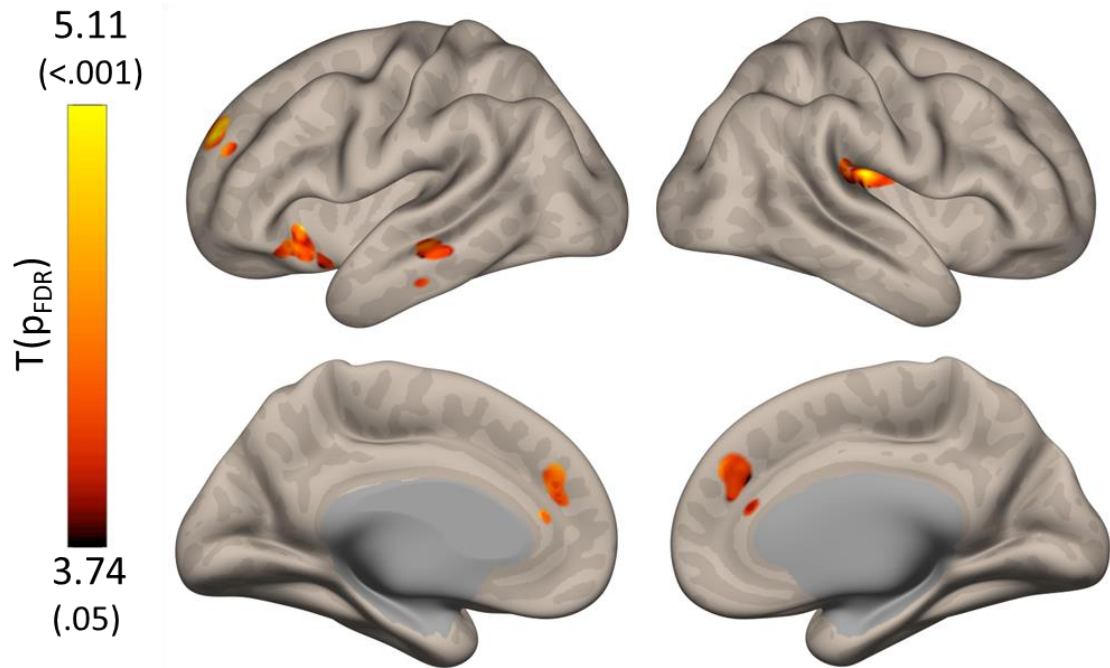

**Fig S5. Seed-to-voxel R parahippocampus connectivity maps of longitudinal differences**  
 Seed: right parahippocampus Area3. POST > PRE-intervention of the resting state brain imaging data – group level. n = 17, p < 0.05, FDR corrected, parametric stats, two sided. See also Supplementary Table S2 for details.

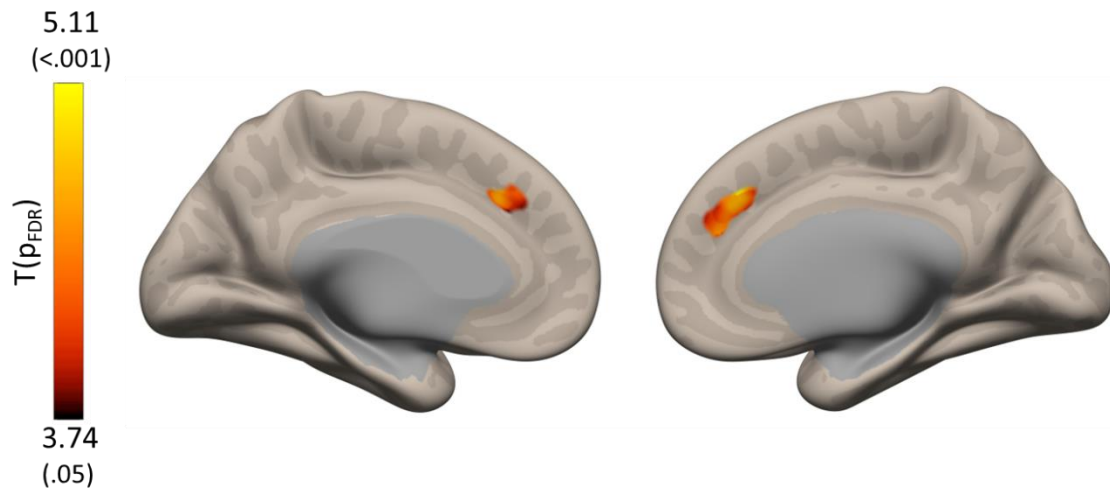

**Fig S6. Seed-to-voxel L parahippocampus connectivity maps of longitudinal differences.**  
 Seed: left parahippocampus Area3. POST > PRE-intervention of the resting state brain imaging data – group level. n = 17, p < 0.05, FDR corrected, parametric stats, two sided. See also Supplementary Table S2 for details.



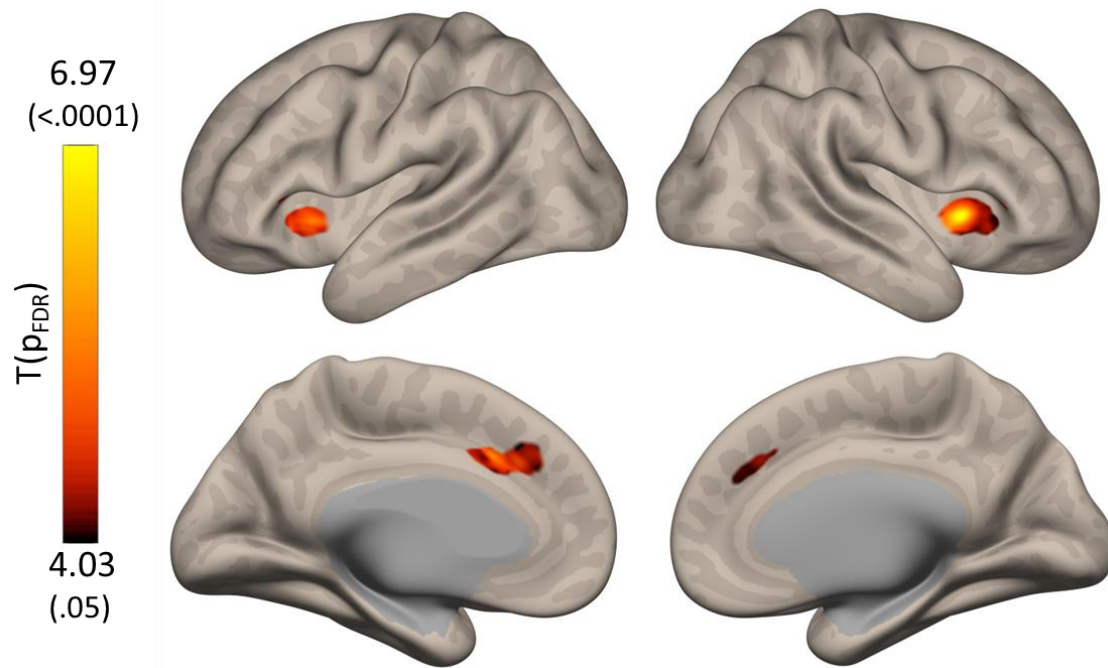

**Fig S7. Seed-to-voxel R parahippocampus connectivity maps of longitudinal differences.** Seed: right parahippocampal Area2. POST > PRE-intervention of the resting state brain imaging data – group level.  $n = 17$ ,  $p < 0.05$ , FDR corrected, parametric stats, two sided. See also Supplementary Table S2 for details.

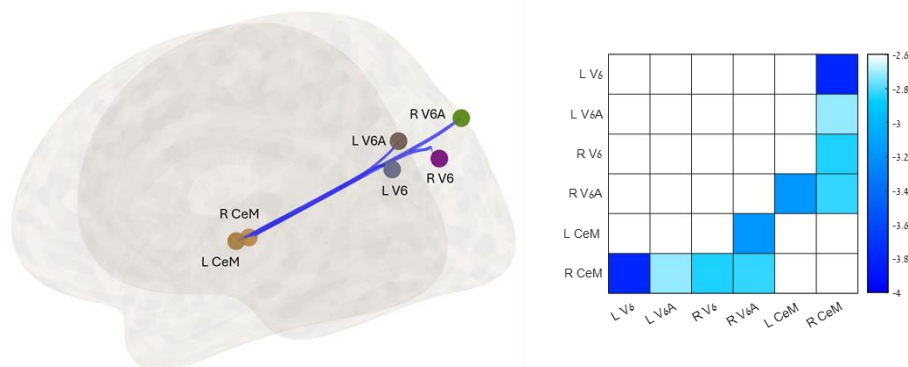

**Fig S8. ROI-to-ROI navigation network analysis of longitudinal post-intervention differences.** Brain network representation and a connectivity matrix of significant post-intervention alternations. A significant increased anticorrelation rsFC was demonstrated between the left and right visual area V6 and V6A and the central medial nucleus of the thalamus (CeM). CeM, central medial nucleus of the thalamus, POST > PRE-Intervention,  $n = 17$ ,  $p_{FDR} < 0.05$ , ( $F_{NEG} < -2.73$ ), White = NS

### 3 References

1. Huang, C.-C., Rolls, E.T., Feng, J., and Lin, C.-P. (2022). An extended Human Connectome Project multimodal parcellation atlas of the human cortex and subcortical areas. *Brain Structure Function* 227, 763-778.
2. Chebat, D.-R., Maidenbaum, S., and Amedi, A. (2015). Navigation using sensory substitution in real and virtual mazes. *PloS one* 10, e0126307.
